# Supplementary material
Source: Springer Nature journal article supplement (https://www.springermedizin.de/resource/supplementary/12955_2010_682_MOESM1_ESM.pdf/9561082)
Supplement: MOESM1 [file 9561082]

|                                 | <b>Intervention group (IG)</b>                                                                                                                                                                                 | <b>Control group (CG)</b>                                                     |
|---------------------------------|----------------------------------------------------------------------------------------------------------------------------------------------------------------------------------------------------------------|-------------------------------------------------------------------------------|
| Stroke Unit / neurological ward | Individual assignment to IG or CG depended on the community pharmacy to which the patients were assigned for care medication review process patient's health-related quality of life (SF-36) medication record |                                                                               |
|                                 | counselling interview                                                                                                                                                                                          |                                                                               |
| Seamless care                   | Care plan for the community pharmacy, rehabilitation hospital and general practitioner from the clinical pharmacist                                                                                            |                                                                               |
| Community pharmacy              | <b>Pharmaceutical Care</b><br>medication review process<br>counselling interview (secondary prevention, cardiovascular risk factors and their medicines)<br>Detecting and solving drug-related problems        | <b>Standard Care</b> (it depends on the pharmacist in the community pharmacy) |
| After 12 months                 | patient's health-related quality of life (SF-36)                                                                                                                                                               |                                                                               |
